# Supplementary material for: FcyRIIB is a novel immune checkpoint in the tumor microenvironment limiting activity of Treg-targeting antibodies
Source: PubMed Central journal article supplement — bioRxiv. 2023 Jan 20:2023.01.19.522856. Preprint. [Version 1] doi: 10.1101/2023.01.19.522856 (PMC9884505; doi:10.1101/2023.01.19.522856), 2023-01-20
Supplement: NIHPP2023.01.19.522856v1-supplement-1.pdf [file NIHPP2023.01.19.522856v1-supplement-1.pdf]

Supplemental Figure 1  
Supplementary Figure 1

**A Antibody sequences (from <https://drugs.ncats.io/>)**

**10D1 (Ipilimumab) VH**

QVQLVESGGGVVQPGRSLRLSCAASGFTFSSYTMHWVRQAPGKGLEWVTFISY  
DGNNKYADSVKGRFTISRDNKNTLYLQMNSLRAEDTAIYYCARTGWLGPFDY  
WGQGLTVTVSS

**10D1 VL**

EIVLTQSPGTLSPGERATLSCRASQSVGSSYLAWYQQKPGQAPRLLIYGAFSRAT  
GIP DRFSGSGSGTDFTLTISRLEPEDFAVYYCQQYGSSPWTFGQGTKVEIKR

**1121 (Tremelimumab) VH**

QVQLVESGGGVVQPGRSLRLSCAASGFTFSSYGMHWVRQAPGKGLEWVAVIWI  
YDGSNKYADSVKGRFTISRDNKNTLYLQMNSLRAEDTAVYYCARDPRGATLYYYY  
YGMADVWGQGT VTVSS

**1121 VL**

DIQMTQSPSSLSASVGRVITCRASQSINSYLDWYQQKPGKAPKLLIYAASSLQS  
GVPS RFSGSGSGTDFTLTISLQPEDFATYYCQYYSTPFTFGPGTKVEIKR

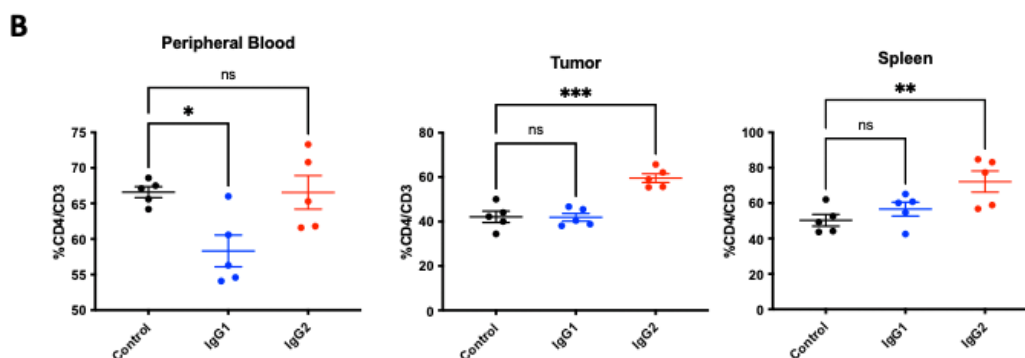

**Supplementary Figure 1:** A) Amino acid sequence of each of the human anti-CTLA-4 antibodies used in these studies. B) In vivo evaluation of the MC38 colon carcinoma tumor microenvironment of subcutaneous tumors following systemic (i.p.) administration of anti-CD4-IgG1 or anti-CD4-IgG2 (both clone GK1.5) when compared to IgG1 isotype control. Tumor bearing hCTLA-4/hFcγR mice were treated with 200 μg of anti-CD4 mAb variants on days 0 and 3 following randomization, and sacrificed 24 hours later for flow cytometry analysis of CD4 T cells in the peripheral blood, tumor, or spleen.

**Supplementary Table 1.** Demographics of HNSCC patient tumor biopsies.

| Age | Gender | Stage  | Smoker |
|-----|--------|--------|--------|
| 58  | M      | T3 N3b | Yes    |
| 68  | M      | T4b N0 | Yes    |
| 63  | F      | T2 N0  | No     |
| 52  | M      | T3 N0  | Yes    |
| 72  | F      | T2 N2c | No     |
| 66  | M      | T3 N1  | Yes    |
| 51  | M      | T1 N0  | Yes    |
| 52  | F      | T1 N0  | No     |
| 60  | M      | T3 N2b | Yes    |
| 66  | F      | T2 N0  | Yes    |
| 42  | F      | T1 N0  | Yes    |
| 41  | M      | T1 N0  | No     |
| 50  | M      | T2 N0  | No     |
| 64  | M      | T1 N0  | No     |
| 83  | M      | T4a N0 | No     |
| 74  | M      | T3 N2a | Yes    |
| 61  | M      | T2 N1  | Yes    |
